# Supplementary material for: Diversification of spider silk properties in an adaptive radiation of Hawaiian orb-weaving spiders
Source: Frontiers journal article supplement (doi:10.3389/frchs.2024.1386353), 2024-05-24
Supplement: Table_3.XLSX [file Table_3.XLSX]

## Sheet: Sheet1
Table S3. Raw data of capture spiral morphology measurements. Values represent the average per web for each individual spider.
Species	Individual ID	Volume per droplet (µm3)	Volume per droplet (ln µm3)	Spacing (um)	Spacing (ln um)	Glue volume per mm (µm3)	Glue volume per mm (ln µm3)
T. hawaiensis (Maui)	T.ha01_M	873.202	6.77217	132.678	4.88792	6535.54	8.78501
T. hawaiensis (Maui)	T.ha02_M	402.198	5.99695	32.5979	3.48425	12323.2	9.41924
T. hawaiensis (Maui)	T.ha03_M	689.143	6.53545	37.8369	3.63329	23137	10.0492
T. hawaiensis (Maui)	T.ha08_M	706.07	6.55972	75.6578	4.32622	9357.2	9.1439
T. hawaiensis (Maui)	T.ha14_M	446.762	6.10203	78.3833	4.36161	5802.52	8.66605
T. hawaiensis (Maui)	T.ha15_M	175.142	5.16559	89.213	4.49103	1946.74	7.57391
T. hawaiensis (Maui)	T.ha16_M	519.861	6.25356	35.9604	3.58242	14070.6	9.55185
T. hawaiensis (Maui)	T.ha17_M	209.885	5.34656	51.3108	3.9379	4089.94	8.31629
T. hawaiensis (Maui)	T.ha19_M	1417.28	7.2565	117.681	4.76798	12026.3	9.39485
T. hawaiensis (Big Island)	T.ha21H	35.9062	3.58091	25.0353	3.22029	1440.49	7.27274
T. hawaiensis (Big Island)	T.ha23H	30.999	3.43396	27.2195	3.30393	1129.2	7.02926
T. hawaiensis (Big Island)	T.ha24H	62.5363	4.13575	46.0244	3.82917	1357.41	7.21334
T. hawaiensis (Big Island)	T.ha25H	192.288	5.259	42.7676	3.75578	4132.32	8.32659
T. hawaiensis (Big Island)	T.ha29H	48.5553	3.8827	20.1922	3.0053	2376.93	7.77357
T. hawaiensis (Big Island)	T.ha32H	29.1987	3.37412	15.5927	2.7468	1704.57	7.44107
T. hawaiensis (Big Island)	T.ha33H	1065.03	6.97076	76.7367	4.34038	13699	9.52508
T. hawaiensis (Big Island)	T.ha34H	17.0595	2.83671	15.2206	2.72265	1105.24	7.00782
T. hawaiensis (Big Island)	T.ha35H	104.658	4.6507	53.7523	3.98439	2370.29	7.77077
T. hawaiensis (Big Island)	T.ha36H	175.898	5.1699	42.6712	3.75353	4002.04	8.29456
T. hawaiensis (Big Island)	T.ha37H	50.7119	3.92616	17.3297	2.85242	2934.42	7.98427
T. hawaiensis (Big Island)	T.ha39H	283.223	5.64624	46.6578	3.84284	6051.26	8.70802
T. hawaiensis (Big Island)	T.ha40H	122.581	4.80878	30.0534	3.40298	4113.99	8.32215
T. hawaiensis (Big Island)	T.ha41H	95.857	4.56286	30.5948	3.42083	3383.49	8.12666
T. hawaiensis (Big Island)	T.ha42H	418.568	6.03684	127.439	4.84764	3277.83	8.09494
T. stelarobusta	T.st01	774.656	6.65242	48.6629	3.88492	16141.5	9.68915
T. stelarobusta	T.st06	4232.58	8.35057	145.295	4.97877	29124.1	10.2793
T. stelarobusta	T.st13	92.8658	4.53116	50.2837	3.91768	1841.53	7.51835
T. stelarobusta	T.st14	3455.49	8.14772	228.941	5.43347	15562.3	9.65261
T. stelarobusta	T.st15	612.012	6.41675	75.5215	4.32442	8171.67	9.00843
T. stelarobusta	T.st16	1243.62	7.12578	82.6453	4.41456	15003.4	9.61603
T. trituberculata	T.tr01	1697.44	7.43688	97.1297	4.57605	16925.6	9.73658
T. trituberculata	T.tr02	96.6183	4.57077	42.7414	3.75517	2285.32	7.73426
T. trituberculata	T.tr04	2307.05	7.74373	109.947	4.7	20958.1	9.95028
T. trituberculata	T.tr06	449.706	6.1086	65.5826	4.18331	6832.4	8.82943
T. trituberculata	T.tr07	261.152	5.5651	40.3481	3.69754	6409.2	8.76549
T. trituberculata	T.tr08	1265.81	7.14347	83.2037	4.42129	15688.7	9.6607
T. trituberculata	T.tr09	1057.56	6.96372	78.5681	4.36397	13457.2	9.50727
T. trituberculata	T.tr10	1527.29	7.33125	114.596	4.74141	12703.9	9.44966
